# Supplementary material for: Drosophila Ref1/ALYREF regulates transcription and toxicity associated with ALS/FTD disease etiologies
Source: PubMed Central journal article supplement (PMC6487524; doi:10.1186/s40478-019-0710-x), 2019-04-29
Supplement: 40478_2019_710_MOESM1_ESM.pdf [file 40478_2019_710_MOESM1_ESM.pdf]

Table S1

| Dm Gene | CG #    | Stock #  | Genotype                                                            | Source      | Effect on TDP43, hAtx2 |    | Effect on TDP43 |    | Effect by itself |    |
|---------|---------|----------|---------------------------------------------------------------------|-------------|------------------------|----|-----------------|----|------------------|----|
| A2bp1   | CG32062 | 32476    | y[1] sc[*] v[1]; P[y[+t7.7] v[+t1.8]=TriP.HMS00478]attP2            | Bloomington | no effect              | 0  | no effect       | 0  | no effect        | 0  |
| aret    | CG31762 | 38983    | y[1] v[1]; P[y[+t7.7] v[+t1.8]=TriP.HMS01899]attP40                 | Bloomington | no effect              | 0  | no effect       | 0  | no effect        | 0  |
| B52     | CG10851 | 37519    | y[1] sc[*] v[1]; P[y[+t7.7] v[+t1.8]=TriP.HMS01661]attP40           | Bloomington | no effect              | 0  | no effect       | 0  | no effect        | 0  |
| barc    | CG6049  | 42504    | y[1] v[1]; P[y[+t7.7] v[+t1.8]=TriP.HMJ02069]attP40                 | Bloomington | no effect              | 0  | no effect       | 0  | no effect        | 0  |
| bol     | CG4760  | v21536   | w[1118]; P{GD10525}v21536                                           | VDRC        | no effect              | 0  | no effect       | 0  | no effect        | 0  |
| bru-2   | CG43065 | 50631    | y[1] sc[*] v[1]; P[y[+t7.7] v[+t1.8]=TriP.HMC02998]attP2            | Bloomington | no effect              | 0  | no effect       | 0  | no effect        | 0  |
| bru-3   | CG43744 | 43318    | y[1] sc[*] v[1]; P[y[+t7.7] v[+t1.8]=TriP.HMS02702]attP40           | Bloomington | no effect              | 0  | no effect       | 0  | no effect        | 0  |
| caz     | CG3606  | 34839    | y[1] sc[*] v[1]; P[y[+t7.7] v[+t1.8]=TriP.HMS00156]attP2            | Bloomington | no effect              | 0  | no effect       | 0  | no effect        | 0  |
| cbp20   | CG12357 | 42596    | y[1] sc[*] v[1]; P[y[+t7.7] v[+t1.8]=TriP.HMS02428]attP40           | Bloomington | no effect              | 0  | no effect       | 0  | no effect        | 0  |
| CG10466 | CG10466 | 55263    | y[1] sc[*] v[1]; P[y[+t7.7] v[+t1.8]=TriP.HMC03950]attP40           | Bloomington | no effect              | 0  | no effect       | 0  | no effect        | 0  |
| CG10948 | CG10948 | 55280    | y[1] sc[*] v[1]; P[y[+t7.7] v[+t1.8]=TriP.HMC03967]attP40           | Bloomington | no effect              | 0  | no effect       | 0  | no effect        | 0  |
| CG11266 | CG11266 | 44431    | y[1] sc[*] v[1]; P[y[+t7.7] v[+t1.8]=TriP.GLC01382]attP2/TM3, Sb[1] | Bloomington | no effect              | 0  | no effect       | 0  | no effect        | 0  |
| CG11454 | CG11454 | GLC01372 | y[1] v[1]; P[y[+t7.7] v[+t1.8]=TriP.GLC01372]attP40                 | TRIP center | no effect              | 0  | no effect       | 0  | no effect        | 0  |
| CG12288 | CG12288 | 56037    | y[1] sc[*] v[1]; P[y[+t7.7] v[+t1.8]=TriP.HMC04345]attP40           | Bloomington | no effect              | 0  | suppression     | 3  | no effect        | 0  |
| CG1316  | CG1316  | v23851   | w[1118]; P{GD7942}v23851/TM3                                        | VDRC        | no effect              | 0  | no effect       | 0  | no effect        | 0  |
| CG13298 | CG13298 | 42873    | y[1] sc[*] v[1]; P[y[+t7.7] v[+t1.8]=TriP.HMS02566]attP40           | Bloomington | enhancement            | -3 | enhancement     | -2 | an effect        | -2 |
| CG14641 | CG14641 | v38790   | w[1118]; P{GD8388}v38790/TM3                                        | VDRC        | no effect              | 0  | no effect       | 0  | no effect        | 0  |
| CG14718 | CG14718 | 38331    | y[1] sc[*] v[1]; P[y[+t7.7] v[+t1.8]=TriP.HMS01798]attP2            | Bloomington | no effect              | 0  | no effect       | 0  | no effect        | 0  |
| CG15440 | CG15440 | 57807    | y[1] v[1]; P[y[+t7.7] v[+t1.8]=TriP.HMJ21815]attP40                 | Bloomington | suppression            | 1  | Suppression     | 3  | no effect        | 0  |
| CG17187 | CG17187 | 55702    | y[1] sc[*] v[1]; P[y[+t7.7] v[+t1.8]=TriP.HMC03923]attP40           | Bloomington | enhancement            | -1 | Suppression     | 2  | no effect        | 0  |
| CG18259 | CG18259 | 34081    | y[1] sc[*] v[1]; P[y[+t7.7] v[+t1.8]=TriP.HMS01089]attP2/TM3, Sb[1] | Bloomington | no effect              | 0  | no effect       | 0  | no effect        | 0  |
| CG2931  | CG2931  | v20946   | w[1118]; P{GD9858}v20946                                            | VDRC        | no effect              | 0  | no effect       | 0  | no effect        | 0  |
| CG3294  | CG3294  | 27296    | y[1] v[1]; P[y[+t7.7] v[+t1.8]=TriP.JF02606]attP2                   | Bloomington | no effect              | 0  | no effect       | 0  | no effect        | 0  |
| CG3335  | CG3335  | 17737    | w[1118]; PBac{w[+mC]=PB}CG3335{c05958}/TM6B, Tb[1]                  | Bloomington | no effect              | 0  | no effect       | 0  | no effect        | 0  |
| CG33713 | CG33713 | 55374    | y[1] sc[*] v[1]; P[y[+t7.7] v[+t1.8]=TriP.HMC04062]attP40/CyO       | Bloomington | no effect              | 0  | no effect       | 0  | no effect        | 0  |
| CG34354 | CG34354 | 33674    | y[1] sc[*] v[1]; P[y[+t7.7] v[+t1.8]=TriP.HMS00538]attP2            | Bloomington | no effect              | 0  | no effect       | 0  | no effect        | 0  |
| CG34362 | CG34362 | v39749   | w[1118]; P{GD7852}v39749                                            | VDRC        | no effect              | 0  | no effect       | 1  | no effect        | 0  |
| CG4119  | CG4119  | v26395   | w[1118]; P{GD11222}v26395                                           | VDRC        | no effect              | 0  | no effect       | 0  | no effect        | 0  |
| CG42458 | CG42458 | 42506    | y[1] v[1]; P[y[+t7.7] v[+t1.8]=TriP.HMJ02071]attP40                 | Bloomington | no effect              | 0  | no effect       | 3  | no effect        | 0  |
| CG4266  | CG4266  | v26472   | w[1118]; P{GD11266}v26472                                           | VDRC        | no effect              | 0  | no effect       | 0  | no effect        | 0  |
| CG4612  | CG4612  | v52497   | w[1118]; P{GD11372}v52497                                           | VDRC        | enhancement            | -1 | enhancement     | -1 | an effect        | -1 |
| CG4806  | CG4887  | v26633   | w[1118]; P{GD11434}v26633                                           | VDRC        | Not done               |    | no effect       | 0  | no effect        | 0  |
| CG4887  | CG4887  | v21969   | w[1118]; P{GD11458}v21969                                           | VDRC        | no effect              | 0  | no effect       | 0  | no effect        | 0  |
| CG4896  | CG4896  | v26652   | w[1118]; P{GD11461}v26652                                           | VDRC        | no effect              | 0  | no effect       | 0  | no effect        | 0  |
| CG5808  | CG5808  | v22199   | w[1118]; P{GD11774}v22199                                           | VDRC        | no effect              | 0  | no effect       | 0  | no effect        | 0  |
| CG6937  | CG6937  | 41824    | y[1] v[1]; P[y[+t7.7] v[+t1.8]=TriP.GL01252]attP2/TM3, Sb[1]        | Bloomington | no effect              | 0  | no effect       | 0  | no effect        | 0  |
| CG7185  | CG7185  | 34804    | y[1] sc[*] v[1]; P[y[+t7.7] v[+t1.8]=TriP.HMS00113]attP2            | Bloomington | enhancement (lethal)   | -3 | enhancement     | -3 | an effect        | -1 |
| CG7804  | CG7804  | 42579    | y[1] sc[*] v[1]; P[y[+t7.7] v[+t1.8]=TriP.HMS01884]attP2            | Bloomington | no effect              | 0  | no effect       | 0  | no effect        | 0  |
| CG7879  | CG8205  | v15260   | w[1118]; P{GD5974}v15260                                            | VDRC        | no effect              | 0  | no effect       | 0  | no effect        | 0  |
| CG8368  | CG8368  | 42635    | y[1] sc[*] v[1]; P[y[+t7.7] v[+t1.8]=TriP.HMS02471]attP40           | Bloomington | enhancement            | -1 | suppression     | 2  | no effect        | 0  |
| CG9107  | CG9107  | 43547    | y[1] sc[*] v[1]; P[y[+t7.7] v[+t1.8]=TriP.HMS02555]attP40           | Bloomington | no effect              | 0  | no effect       | 0  | no effect        | 0  |
| CG9346  | CG9346  | v27013   | w[1118]; P{GD14194}v27013                                           | VDRC        | no effect              | 0  | no effect       | 0  | no effect        | 0  |
| Cnot4   | CG31716 | 42513    | y[1] v[1]; P[y[+t7.7] v[+t1.8]=TriP.HMJ02078]attP40                 | Bloomington | no effect              | 0  | no effect       | 0  | no effect        | 0  |
| cpo     | CG43738 | 28360    | y[1] v[1]; P[y[+t7.7] v[+t1.8]=TriP.JF02996]attP2                   | Bloomington | no effect              | 0  | no effect       | 0  | no effect        | 0  |
| CstF-64 | CG7697  | v21045   | w[1118]; P{GD9942}v21045/CyO                                        | VDRC        | no effect              | 0  | no effect       | 0  | no effect        | 0  |
| cyp33   | CG4886  | 35611    | y[1] sc[*] v[1]; P[y[+t7.7] v[+t1.8]=TriP.GL00451]attP2/TM3, Sb[1]  | Bloomington | no effect              | 0  | no effect       | 0  | no effect        | 0  |
| elF3-S4 | CG10881 | v35495   | w[1118]; P{GD12611}v35495                                           | VDRC        | enhancement (lethal)   | -3 | suppression     | 3  | an effect        | 1  |
| elF4B   | CG10837 | 57305    | y[1] sc[*] v[1]; P[y[+t7.7] v[+t1.8]=TriP.HMS04503]attP40           | Bloomington | no effect              | 0  | suppression     | 3  | no effect        | 0  |
| elav    | CG4262  | 28371    | y[1] v[1]; P[y[+t7.7] v[+t1.8]=TriP.JF03008]attP2/TM3, Sb[1]        | Bloomington | no effect              | 0  | no effect       | 0  | no effect        | 0  |
| fne     | CG4396  | 28784    | y[1] v[1]; P[y[+t7.7] v[+t1.8]=TriP.JF03212]attP2                   | Bloomington | no effect              | 0  | no effect       | 0  | no effect        | 0  |

|              |         |         |                                                                   |             |                          |    |             |    |           |    |
|--------------|---------|---------|-------------------------------------------------------------------|-------------|--------------------------|----|-------------|----|-----------|----|
| fus          | CG8205  | v107575 | P{KK108164}VIE-260B                                               | VDRC        | no effect                | 0  | no effect   | 0  | no effect | 0  |
| glo          | CG6946  | 33668   | y[1] sc[*] v[1]; P[y[+7.7] v[+1.8]=TriP.HMS00079]attP2            | Bloomington | no effect                | 0  | no effect   | 0  | no effect | 0  |
| gw           | CG31992 | 34796   | y[1] sc[*] v[1]; P[y[+7.7] v[+1.8]=TriP.HMS00105]attP2/TM3, Sb[1] | Bloomington | enhancement              | -3 | enhancement | -1 | an effect | 1  |
| heph         | CG31000 | 27040   | y[1] v[1]; P[y[+7.7] v[+1.8]=TriP.JF02366]attP2                   | Bloomington | no effect                | 0  | no effect   | 0  | no effect | 0  |
| Hrb27C       | CG10377 | 33716   | y[1] sc[*] v[1]; P[y[+7.7] v[+1.8]=TriP.HMS00597]attP2            | Bloomington | suppression              | 1  | enhancement | -1 | no effect | 0  |
| Hrb87F       | CG12749 | 31244   | y[1] v[1]; P[y[+7.7] v[+1.8]=TriP.JF01757]attP2                   | Bloomington | enhancement              | -2 | suppression | 1  | no effect | 0  |
| Hrb98DE      | CG9983  | 32351   | y[1] sc[*] v[1]; P[y[+7.7] v[+1.8]=TriP.HMS00342]attP2            | Bloomington | enhancement              | -1 | enhancement | -1 | no effect | 0  |
| Imp          | CG1691  | 34977   | y[1] sc[*] v[1]; P[y[+7.7] v[+1.8]=TriP.HMS01168]attP2            | Bloomington | no effect                | 0  | no effect   | 0  | no effect | 0  |
| La           | CG10922 | 42789   | y[1] v[1]; P[y[+7.7] v[+1.8]=TriP.GLO1159]attP2/TM3, Sb[1]        | Bloomington | no effect                | 0  | no effect   | 0  | no effect | 0  |
| lark         | CG8597  | 27703   | y[1] v[1]; P[y[+7.7] v[+1.8]=TriP.JF02783]attP2                   | Bloomington | no effect                | 0  | no effect   | 0  | no effect | 0  |
| lost         | CG14648 | 38931   | y[1] sc[*] v[1]; P[y[+7.7] v[+1.8]=TriP.GLO1090]attP2             | Bloomington | no effect                | 0  | no effect   | 0  | no effect | 0  |
| LS2          | CG3162  | 55154   | y[1] sc[*] v[1]; P[y[+7.7] v[+1.8]=TriP.HMC03812]attP40           | Bloomington | no effect                | 0  | no effect   | 0  | no effect | 0  |
| musashi      | CG5099  | 4160    | msi[1]/TM3, Sb[1]                                                 | Bloomington | enhancement              | -2 | enhancement | -1 | no effect | 0  |
| Neif-E       | CG5994  | 32835   | y[1] sc[*] v[1]; P[y[+7.7] v[+1.8]=TriP.HMS00525]attP2/TM3, Sb[1] | Bloomington | no effect                | 0  | no effect   | 0  | no effect | 0  |
| nito         | CG2910  | 34848   | y[1] sc[*] v[1]; P[y[+7.7] v[+1.8]=TriP.HMS00166]attP2            | Bloomington | no effect                | 0  | no effect   | 0  | no effect | 0  |
| nonA         | CG4211  | 52933   | y[1] sc[*] v[1]; P[y[+7.7] v[+1.8]=TriP.HMC03675]attP40           | Bloomington | no effect                | 0  | no effect   | 0  | no effect | 0  |
| nonA-like    | CG10328 | 52934   | y[1] sc[*] v[1]; P[y[+7.7] v[+1.8]=TriP.HMC03676]attP40           | Bloomington | no effect                | 0  | no effect   | 0  | no effect | 0  |
| orb2         | CG43782 | 27050   | y[1] v[1]; P[y[+7.7] v[+1.8]=TriP.JF02376]attP2                   | Bloomington | no effect                | 0  | no effect   | 0  | no effect | 0  |
| pAbp         | CG5119  | 36127   | y[1] sc[*] v[1]; P[y[+7.7] v[+1.8]=TriP.HMS01542]attP40           | Bloomington | no effect                | 0  | no effect   | 0  | no effect | 0  |
| pAbp2        | CG2163  | 34602   | y[1] sc[*] v[1]; P[y[+7.7] v[+1.8]=TriP.HMS00553]attP2            | Bloomington | enhancement              | -2 | no effect   | 0  | no effect | 0  |
| pUf68        | CG12085 | 34785   | y[1] sc[*] v[1]; P[y[+7.7] v[+1.8]=TriP.HMS00094]attP2            | Bloomington | enhancement              | -2 | enhancement | -2 | no effect | 0  |
| Rbp1         | CG17136 | v21083  | w[1118]; P{GD9289}v21083/TM3                                      | VDRC        | no effect                | 0  | suppression | 2  | no effect | 0  |
| Rbp1L        | CG1987  | 44100   | y[1] sc[*] v[1]; P[y[+7.7] v[+1.8]=TriP.HMS02820]attP40           | Bloomington | no effect                | 0  | suppression | 3  | no effect | 0  |
| Rbp2         | CG4429  | 43275   | y[1] sc[*] v[1]; P[y[+7.7] v[+1.8]=TriP.GLC01464]attP2            | Bloomington | no effect                | 0  | no effect   | 0  | no effect | 0  |
| Rbp6         | CG32169 | v29799  | w[1118]; P{GD15236}v29799/CyO                                     | VDRC        | enhancement              | -1 | no effect   | 0  | no effect | 0  |
| Rbp9         | CG3151  | 28669   | y[1] v[1]; P[y[+7.7] v[+1.8]=TriP.JF03084]attP2                   | Bloomington | no effect                | 0  | no effect   | 0  | no effect | 0  |
| Ref1         | CG1101  | 34626   | y[1] sc[*] v[1]; P[y[+7.7] v[+1.8]=TriP.HMS01301]attP2/TM3, Sb[1] | Bloomington | suppression              | 2  | suppression | 3  | no effect | 0  |
| Ref2         | CG17031 | v32829  | w[1118]; P{GD9267}v32829                                          | VDRC        | no effect                | 1  | no effect   | 1  | no effect | 0  |
| rin          | CG9412  | 33392   | y[1] sc[*] v[1]; P[y[+7.7] v[+1.8]=TriP.HMS00269]attP2/TM3, Sb[1] | Bloomington | no effect                | 0  | no effect   | 0  | no effect | 0  |
| Rnp4F        | CG3312  | 35457   | y[1] sc[*] v[1]; P[y[+7.7] v[+1.8]=TriP.GLO0383]attP2             | Bloomington | no effect                | 0  | no effect   | 0  | no effect | 0  |
| Rnp51        | CG16788 | 36580   | y[1] sc[*] v[1]; P[y[+7.7] v[+1.8]=TriP.GLO0540]attP2             | Bloomington | no effect                | 0  | no effect   | -1 | no effect | 0  |
| Rox8         | CG5422  | 32472   | y[1] sc[*] v[1]; P[y[+7.7] v[+1.8]=TriP.HMS00472]attP2            | Bloomington | no effect                | 0  | no effect   | 0  | no effect | 0  |
| rump         | CG9373  | 42665   | y[1] sc[*] v[1]; P[y[+7.7] v[+1.8]=TriP.HMS02501]attP40           | Bloomington | no effect                | 0  | no effect   | 0  | no effect | 0  |
| Saf-B        | CG6997  | 51759   | y[1] v[1]; P[y[+7.7] v[+1.8]=TriP.HMC03311]attP2                  | Bloomington | no effect/black patches? | 0  | suppression | 1  | no effect | 0  |
| SC35         | CG5442  | v40590  | w[1118]; P{GD11654}v40590                                         | VDRC        | no effect                | 0  | no effect   | 0  | no effect | 0  |
| Set1         | CG40351 | 40931   | y[1] sc[*] v[1]; P[y[+7.7] v[+1.8]=TriP.HMS02179]attP40           | Bloomington | no effect                | 0  | no effect   | 0  | no effect | 0  |
| SF2          | CG6987  | 32367   | y[1] sc[*] v[1]; P[y[+7.7] v[+1.8]=TriP.HMS00358]attP2            | Bloomington | no effect                | 0  | suppression | 2  | no effect | 0  |
| shp          | CG32423 | 43545   | y[1] sc[*] v[1]; P[y[+7.7] v[+1.8]=TriP.HMS02666]attP40           | Bloomington | enhancement              | -3 | suppression | 3  | no effect | 0  |
| sm           | CG9218  | v28117  | w[1118]; P{GD12545}v28117/TM3                                     | VDRC        | no effect                | 0  | no effect   | 0  | no effect | 0  |
| snf          | CG4528  | 34953   | y[1] sc[*] v[1]; P[y[+7.7] v[+1.8]=TriP.HMS01067]attP2/TM3, Sb[1] | Bloomington | no effect                | 0  | no effect   | 0  | no effect | 0  |
| Snp          | CG44248 | 33434   | y[1] sc[*] v[1]; P[y[+7.7] v[+1.8]=TriP.HMS00321]attP2            | Bloomington | no effect                | 0  | no effect   | 0  | no effect | 0  |
| snRNP-U1-70K | CG8749  | 33396   | y[1] sc[*] v[1]; P[y[+7.7] v[+1.8]=TriP.HMS00274]attP2            | Bloomington | enhancement              | -3 | enhancement | -2 | lethal    | -3 |
| Spargel      | CG9809  | 33915   | y[1] sc[*] v[1]; P[y[+7.7] v[+1.8]=TriP.HMS00858]attP2            | Bloomington | no effect                | 0  | no effect   | 0  | no effect | 0  |
| spen         | CG18497 | 33398   | y[1] sc[*] v[1]; P[y[+7.7] v[+1.8]=TriP.HMS00276]attP2            | Bloomington | enhancement              | -3 | enhancement | -3 | an effect | -3 |
| Spf45        | CG17540 | 41954   | y[1] sc[*] v[1]; P[y[+7.7] v[+1.8]=TriP.HMS02351]attP2            | Bloomington | no effect                | 0  | no effect   | 0  | no effect | 0  |
| Spx          | CG3780  | v40471  | w[1118]; P{GD11072}v40471                                         | VDRC        | enhancement              | -3 | enhancement | -2 | no effect | 0  |
| sqd          | CG16901 | 31302   | y[1] v[1]; P[y[+7.7] v[+1.8]=TriP.JF01248]attP2                   | Bloomington | no effect                | 0  | no effect   | 0  | no effect | 0  |
| Srp54        | CG6340  | 30533   | y[1] sc[*] v[1]; P[y[+7.7] v[+1.8]=TriP.HM05224]attP2             | Bloomington | no effect                | 0  | no effect   | 0  | no effect | 0  |
| swm          | CG10084 | 52935   | y[1] sc[*] v[1]; P[y[+7.7] v[+1.8]=TriP.HMC03677]attP40           | Bloomington | suppression              | 1  | suppression | 3  | no effect | 0  |
| Sxl          | CG43770 | 34393   | y[1] sc[*] v[1]; P[y[+7.7] v[+1.8]=TriP.HMS00609]attP2            | Bloomington | no effect                | 0  | no effect   | 0  | no effect | 0  |
| Syp          | CG17838 | v33011  | w[1118]; P{GD9477}v33011                                          | VDRC        | no effect                | 0  | no effect   | 0  | no effect | 0  |
| TBPH         | CG10327 | 39014   | y[1] v[1]; P[y[+7.7] v[+1.8]=TriP.HMS01932]attP40                 | Bloomington | no effect                | 0  | no effect   | 0  | no effect | 0  |

|        |         |       |                                                  |             |           |   |             |   |           |   |
|--------|---------|-------|--------------------------------------------------|-------------|-----------|---|-------------|---|-----------|---|
| tra2   | CG10128 | 28018 | y[1] v[1]; P{y[+7.7] v[+1.8]=TRiP.JF02852}attP2  | Bloomington | no effect | 0 | no effect   | 0 | no effect | 0 |
| tsu    | CG8781  | 28955 | y[1] v[1]; P{y[+7.7] v[+1.8]=TRiP.HM05166}attP2  | Bloomington | no effect | 0 | suppression | 3 | no effect | 0 |
| U2af38 | CG3582  | 29304 | y[1] v[1]; P{y[+7.7] v[+1.8]=TRiP.JF02444}attP2  | Bloomington | no effect | 0 | suppression | 3 | no effect | 0 |
| U2af50 | CG9998  | 27542 | y[1] v[1]; P{y[+7.7] v[+1.8]=TRiP.JF02693}attP2  | Bloomington | no effect | 0 | no effect   | 0 | no effect | 0 |
| x16    | CG10203 | 51468 | y[1] v[1]; P{y[+7.7] v[+1.8]=TRiP.HMC03209}attP2 | Bloomington | no effect | 0 | no effect   | 0 | no effect | 0 |
