# Supplementary material for: Drosophila Ref1/ALYREF regulates transcription and toxicity associated with ALS/FTD disease etiologies
Source: PubMed Central journal article supplement (PMC6487524; doi:10.1186/s40478-019-0710-x), 2019-04-29
Supplement: 40478_2019_710_MOESM4_ESM.pdf [file 40478_2019_710_MOESM4_ESM.pdf]

Table S3

| Gene         | Stock # | Genotype                                                          | Source      |
|--------------|---------|-------------------------------------------------------------------|-------------|
| A2bp1        | 32476   | y[1] sc[*] v[1]; P{y[+7.7] v[+1.8]=TRiP.HMS00478}attP2            | Bloomington |
| aret         | 38983   | y[1] v[1]; P{y[+7.7] v[+1.8]=TRiP.HMS01899}attP40                 | Bloomington |
| barc         | 42504   | y[1] v[1]; P{y[+7.7] v[+1.8]=TRiP.HMJ02069}attP40                 | Bloomington |
| bol          | 21536   | w[1118]; P{GD10525}v21536                                         | VDR         |
| bru-2        | 50631   | y[1] sc[*] v[1]; P{y[+7.7] v[+1.8]=TRiP.HMC02998}attP2            | Bloomington |
| bru-3        | 43318   | y[1] sc[*] v[1]; P{y[+7.7] v[+1.8]=TRiP.HMS02702}attP40           | Bloomington |
| B52          | 37519   | y[1] sc[*] v[1]; P{y[+7.7] v[+1.8]=TRiP.HMS01661}attP40           | Bloomington |
| caz          | 34839   | y[1] sc[*] v[1]; P{y[+7.7] v[+1.8]=TRiP.HMS00156}attP2            | Bloomington |
| Cbp20        | 42596   | y[1] sc[*] v[1]; P{y[+7.7] v[+1.8]=TRiP.HMS02428}attP40           | Bloomington |
| Cnot4        | 42513   | y[1] v[1]; P{y[+7.7] v[+1.8]=TRiP.HMJ02078}attP40                 | Bloomington |
| cpo          | 28360   | y[1] v[1]; P{y[+7.7] v[+1.8]=TRiP.JF02996}attP2                   | Bloomington |
| CstF-64      | 31812   | w[1118]; P{w[+mC]=EP}CstF-64[G16431]                              | Bloomington |
| CstF-64      | 21045   | w[1118]; P{GD9942}v21045/CyO                                      | VDR         |
| cyp33        | 35611   | y[1] sc[*] v[1]; P{y[+7.7] v[+1.8]=TRiP.GL00451}attP2/TM3, Sb[1]  | Bloomington |
| elav         | 28371   | y[1] v[1]; P{y[+7.7] v[+1.8]=TRiP.JF03008}attP2/TM3, Sb[1]        | Bloomington |
| eIF3-S4      | 35495   | w[1118]; P{GD12611}v35495                                         | VDR         |
| eIF-4B       | 57305   | y[1] sc[*] v[1]; P{y[+7.7] v[+1.8]=TRiP.HMS04503}attP40           | Bloomington |
| fne          | 28784   | y[1] v[1]; P{y[+7.7] v[+1.8]=TRiP.JF03212}attP2                   | Bloomington |
| fus          | 107575  | P{KK108164}VIE-260B                                               | VDR         |
| glo          | 33668   | y[1] sc[*] v[1]; P{y[+7.7] v[+1.8]=TRiP.HMS00079}attP2            | Bloomington |
| gw           | 34796   | y[1] sc[*] v[1]; P{y[+7.7] v[+1.8]=TRiP.HMS00105}attP2/TM3, Sb[1] | Bloomington |
| heph         | 27040   | y[1] v[1]; P{y[+7.7] v[+1.8]=TRiP.JF02366}attP2                   | Bloomington |
| Hrb27C       | 33716   | y[1] sc[*] v[1]; P{y[+7.7] v[+1.8]=TRiP.HMS00597}attP2            | Bloomington |
| Hrb87F       | 31244   | y[1] v[1]; P{y[+7.7] v[+1.8]=TRiP.JF01757}attP2                   | Bloomington |
| Hrb98DE      | 32351   | y[1] sc[*] v[1]; P{y[+7.7] v[+1.8]=TRiP.HMS00342}attP2            | Bloomington |
| Imp          | 34977   | y[1] sc[*] v[1]; P{y[+7.7] v[+1.8]=TRiP.HMS01168}attP2            | Bloomington |
| La           | 42789   | y[1] v[1]; P{y[+7.7] v[+1.8]=TRiP.GL01159}attP2/TM3, Sb[1]        | Bloomington |
| lark         | 27703   | y[1] v[1]; P{y[+7.7] v[+1.8]=TRiP.JF02783}attP2                   | Bloomington |
| lost         | 38931   | y[1] sc[*] v[1]; P{y[+7.7] v[+1.8]=TRiP.GL01090}attP2             | Bloomington |
| LS2          | 55154   | y[1] sc[*] v[1]; P{y[+7.7] v[+1.8]=TRiP.HMC03812}attP40           | Bloomington |
| musashi[1]   | 4160    | msi[1]/TM3, Sb[1]                                                 | Bloomington |
| musashi[2]   | 4161    | msi[2]/TM3, Sb[1]                                                 | Bloomington |
| Nelf-E       | 32835   | y[1] sc[*] v[1]; P{y[+7.7] v[+1.8]=TRiP.HMS00525}attP2/TM3, Sb[1] | Bloomington |
| nito         | 34848   | y[1] sc[*] v[1]; P{y[+7.7] v[+1.8]=TRiP.HMS00166}attP2            | Bloomington |
| nonA         | 52933   | y[1] sc[*] v[1]; P{y[+7.7] v[+1.8]=TRiP.HMC03675}attP40           | Bloomington |
| nonA-like    | 52934   | y[1] sc[*] v[1]; P{y[+7.7] v[+1.8]=TRiP.HMC03676}attP40           | Bloomington |
| orb2         | 27050   | y[1] v[1]; P{y[+7.7] v[+1.8]=TRiP.JF02376}attP2                   | Bloomington |
| pAbp         | 36127   | y[1] sc[*] v[1]; P{y[+7.7] v[+1.8]=TRiP.HMS01542}attP40           | Bloomington |
| pAbp2        | 34602   | y[1] sc[*] v[1]; P{y[+7.7] v[+1.8]=TRiP.HMS00553}attP2            | Bloomington |
| pUf68        | 34785   | y[1] sc[*] v[1]; P{y[+7.7] v[+1.8]=TRiP.HMS00094}attP2            | Bloomington |
| Rbp1         | 21083   | w[1118]; P{GD9289}v21083/TM3                                      | VDR         |
| Rbp1-like    | 44100   | y[1] sc[*] v[1]; P{y[+7.7] v[+1.8]=TRiP.HMS02820}attP40           | Bloomington |
| Rbp2         | 43275   | y[1] sc[*] v[1]; P{y[+7.7] v[+1.8]=TRiP.GL01464}attP2             | Bloomington |
| Rbp6         | 29799   | w[1118]; P{GD15236}v29799/CyO                                     | VDR         |
| Rbp9         | 28669   | y[1] v[1]; P{y[+7.7] v[+1.8]=TRiP.JF03084}attP2                   | Bloomington |
| Ref1         | 34626   | y[1] sc[*] v[1]; P{y[+7.7] v[+1.8]=TRiP.HMS01301}attP2/TM3, Sb[1] | Bloomington |
| Ref2         | 32829   | w[1118]; P{GD9267}v32829                                          | VDR         |
| rin          | 33392   | y[1] sc[*] v[1]; P{y[+7.7] v[+1.8]=TRiP.HMS00269}attP2/TM3, Sb[1] | Bloomington |
| RnpS1        | 36580   | y[1] sc[*] v[1]; P{y[+7.7] v[+1.8]=TRiP.GL00540}attP2             | Bloomington |
| Rnp4F        | 35457   | y[1] sc[*] v[1]; P{y[+7.7] v[+1.8]=TRiP.GL00383}attP2             | Bloomington |
| Rox8         | 32472   | y[1] sc[*] v[1]; P{y[+7.7] v[+1.8]=TRiP.HMS00472}attP2            | Bloomington |
| rump         | 42665   | y[1] sc[*] v[1]; P{y[+7.7] v[+1.8]=TRiP.HMS02501}attP40           | Bloomington |
| Saf-B        | 51759   | y[1] v[1]; P{y[+7.7] v[+1.8]=TRiP.HMC03311}attP2                  | Bloomington |
| SC35         | 40590   | w[1118]; P{GD11654}v40590                                         | VDR         |
| Set1         | 40931   | y[1] sc[*] v[1]; P{y[+7.7] v[+1.8]=TRiP.HMS02179}attP40           | Bloomington |
| SF2          | 32367   | y[1] sc[*] v[1]; P{y[+7.7] v[+1.8]=TRiP.HMS00358}attP2            | Bloomington |
| shep         | 43545   | y[1] sc[*] v[1]; P{y[+7.7] v[+1.8]=TRiP.HMS02666}attP40           | Bloomington |
| sm           | 28117   | w[1118]; P{GD12545}v28117/TM3                                     | VDR         |
| snf          | 34953   | y[1] sc[*] v[1]; P{y[+7.7] v[+1.8]=TRiP.HMS01067}attP2/TM3, Sb[1] | Bloomington |
| Snp          | 33434   | y[1] sc[*] v[1]; P{y[+7.7] v[+1.8]=TRiP.HMS00321}attP2            | Bloomington |
| snRNP-U1-70K | 33396   | y[1] sc[*] v[1]; P{y[+7.7] v[+1.8]=TRiP.HMS00274}attP2            | Bloomington |

|                 |               |                                                                   |             |
|-----------------|---------------|-------------------------------------------------------------------|-------------|
| Spargel         | 33915         | y[1] sc[*] v[1]; P{y[+7.7] v[+1.8]=TRiP.HMS00858}attP2            | Bloomington |
| spen            | 33398         | y[1] sc[*] v[1]; P{y[+7.7] v[+1.8]=TRiP.HMS00276}attP2            | Bloomington |
| Spf45           | 41954         | y[1] sc[*] v[1]; P{y[+7.7] v[+1.8]=TRiP.HMS02351}attP2            | Bloomington |
| Spx             | 40471         | w[1118]; P{GD11072}v40471                                         | VDRC        |
| sqd             | 31302         | y[1] v[1]; P{y[+7.7] v[+1.8]=TRiP.JF01248}attP2                   | Bloomington |
| Srp54           | 30533         | y[1] sc[*] v[1]; P{y[+7.7] v[+1.8]=TRiP.HM05224}attP2             | Bloomington |
| swm             | 28548         | y[1] v[1]; P{y[+7.7] v[+1.8]=TRiP.HM05034}attP2                   | Bloomington |
| swm             | 52935         | y[1] sc[*] v[1]; P{y[+7.7] v[+1.8]=TRiP.HMC03677}attP40           | Bloomington |
| Sxl             | 34393         | y[1] sc[*] v[1]; P{y[+7.7] v[+1.8]=TRiP.HMS00609}attP2            | Bloomington |
| Syp             | 33011         | w[1118]; P{GD9477}v33011                                          | VDRC        |
| TBPH            | 39014         | y[1] v[1]; P{y[+7.7] v[+1.8]=TRiP.HMS01932}attP40                 | Bloomington |
| tra2            | 28018         | y[1] v[1]; P{y[+7.7] v[+1.8]=TRiP.JF02852}attP2                   | Bloomington |
| tsu             | 28955         | y[1] v[1]; P{y[+7.7] v[+1.8]=TRiP.HM05166}attP2                   | Bloomington |
| U2af38          | 29304         | y[1] v[1]; P{y[+7.7] v[+1.8]=TRiP.JF02444}attP2                   | Bloomington |
| U2af50          | 27542         | y[1] v[1]; P{y[+7.7] v[+1.8]=TRiP.JF02693}attP2                   | Bloomington |
| x16             | 51468         | y[1] v[1]; P{y[+7.7] v[+1.8]=TRiP.HMC03209}attP2                  | Bloomington |
| CG1316          | 23851         | w[1118]; P{GD7942}v23851/TM3                                      | VDRC        |
| CG2931          | 20946         | w[1118]; P{GD9858}v20946                                          | VDRC        |
| CG3294          | 27296         | y[1] v[1]; P{y[+7.7] v[+1.8]=TRiP.JF02606}attP2                   | Bloomington |
| CG3335          | 17737         | w[1118]; PBac{w[+mC]=PB}CG3335{c05958}/TM6B, Tb[1]                | Bloomington |
| CG4119          | 26395         | w[1118]; P{GD11222}v26395                                         | VDRC        |
| CG4266          | 26472         | w[1118]; P{GD11266}v26472                                         | VDRC        |
| CG4612          | 52497         | w[1118]; P{GD11372}v52497                                         | VDRC        |
| CG4806          | 26633         | w[1118]; P{GD11434}v26633                                         | VDRC        |
| CG4887          | 21969         | w[1118]; P{GD11458}v21969                                         | VDRC        |
| CG4896          | 26652         | w[1118]; P{GD11461}v26652                                         | VDRC        |
| CG5808          | 22199         | w[1118]; P{GD11774}v22199                                         | VDRC        |
| CG6937          | 41824         | y[1] v[1]; P{y[+7.7] v[+1.8]=TRiP.GL01252}attP2/TM3, Sb[1]        | Bloomington |
| CG7185 (wah)    | 34804         | y[1] sc[*] v[1]; P{y[+7.7] v[+1.8]=TRiP.HMS00113}attP2            | Bloomington |
| CG7804          | 42579         | y[1] sc[*] v[1]; P{y[+7.7] v[+1.8]=TRiP.HMS01884}attP2            | Bloomington |
| CG7879          | 15260         | w[1118]; P{GD5974}v15260                                          | VDRC        |
| CG8368          | 42635         | y[1] sc[*] v[1]; P{y[+7.7] v[+1.8]=TRiP.HMS02471}attP40           | Bloomington |
| CG9107          | 43547         | y[1] sc[*] v[1]; P{y[+7.7] v[+1.8]=TRiP.HMS02555}attP40           | Bloomington |
| CG9346          | 27013         | w[1118]; P{GD14194}v27013                                         | VDRC        |
| CG10466         | 55263         | y[1] sc[*] v[1]; P{y[+7.7] v[+1.8]=TRiP.HMC03950}attP40           | Bloomington |
| CG10948         | 31388         | w[1118]; P{GD7139}v31388                                          | VDRC        |
| CG10948         | 55280         | y[1] sc[*] v[1]; P{y[+7.7] v[+1.8]=TRiP.HMC03967}attP40           | Bloomington |
| CG11266         | 44431         | y[1] sc[*] v[1]; P{y[+7.7] v[+1.8]=TRiP.GLC01382}attP2/TM3, Sb[1] | Bloomington |
| CG11454         | not available | GLC01372                                                          | TRiP center |
| CG12288         | 56037         | y[1] sc[*] v[1]; P{y[+7.7] v[+1.8]=TRiP.HMC04345}attP40           | Bloomington |
| CG13298         | 42873         | y[1] sc[*] v[1]; P{y[+7.7] v[+1.8]=TRiP.HMS02566}attP40           | Bloomington |
| CG14641         | 38790         | w[1118]; P{GD8388}v38790/TM3                                      | VDRC        |
| CG14718         | 38331         | y[1] sc[*] v[1]; P{y[+7.7] v[+1.8]=TRiP.HMS01798}attP2            | Bloomington |
| CG15440         | 57807         | y[1] v[1]; P{y[+7.7] v[+1.8]=TRiP.HMJ21815}attP40                 | Bloomington |
| CG17187         | 40051         | w[1118]; P{GD9309}v40051                                          | VDRC        |
| CG17187         | 55702         | y[1] sc[*] v[1]; P{y[+7.7] v[+1.8]=TRiP.HMC03923}attP40           | Bloomington |
| CG18259         | 34081         | y[1] sc[*] v[1]; P{y[+7.7] v[+1.8]=TRiP.HMS01089}attP2/TM3, Sb[1] | Bloomington |
| CG33713/CG33714 | 55374         | y[1] sc[*] v[1]; P{y[+7.7] v[+1.8]=TRiP.HMC04062}attP40/CyO       | Bloomington |
| CG34354         | 33674         | y[1] sc[*] v[1]; P{y[+7.7] v[+1.8]=TRiP.HMS00538}attP2            | Bloomington |
| CG34362         | 39749         | w[1118]; P{GD7852}v39749                                          | VDRC        |
| CG42458         | 42506         | y[1] v[1]; P{y[+7.7] v[+1.8]=TRiP.HMJ02071}attP40                 | Bloomington |
