# Supplementary material for: Drosophila Ref1/ALYREF regulates transcription and toxicity associated with ALS/FTD disease etiologies
Source: PubMed Central journal article supplement (PMC6487524; doi:10.1186/s40478-019-0710-x), 2019-04-29
Supplement: 40478_2019_710_MOESM5_ESM.pdf [file 40478_2019_710_MOESM5_ESM.pdf]

Table S4

| <b>primer name</b> | <b>sequence 5'-3'</b> | <b>Reference</b>                                                                          |
|--------------------|-----------------------|-------------------------------------------------------------------------------------------|
| TDP-43-F           | GCTGGGGAAATCTGGTGTAT  | This manuscript                                                                           |
| TDP-43-R           | CGGATGTTTTCTGGACTGCT  | This manuscript                                                                           |
| UAS-G4C2-F         | AGACTCGGTACCGGATCCTC  | Goodman et al., Nat Neuro, in press                                                       |
| UAS-G4C2-R         | GCTCCATTTCATCAGTTCCA  | Goodman et al., Nat Neuro, in press                                                       |
| UAS-LDS-G4C2-F     | ACGTAAACGGCCACAAGTTC  | Goodman et al., Nat Neuro, in press                                                       |
| UAS-LDS-G4C2-R     | AAGTCGTGCTGCTTCATGTG  | Goodman et al., Nat Neuro, in press                                                       |
| Tau#1-F            | AAGGTGACCTCCAAGTGTGG  | This manuscript                                                                           |
| Tau#1-R            | GGACGTGGGTGATATTGTCC  | This manuscript                                                                           |
| beta Gal #2-F      | GTGCGGATTGAAAATGGTCT  | This manuscript                                                                           |
| beta Gal #2-R      | GACCTGACCATGCAGAGGAT  | This manuscript                                                                           |
| Ref1-F             | CCGTTCAGAAGGCCAAGTT   | This manuscript                                                                           |
| Ref1-R             | AGTCCAGGTTACCGACGATG  | This manuscript                                                                           |
| RpS20-F            | CCGCATCACCTGACATCC    | Colinet et al., FEBS J. 2010 Jan;277(1):174-85                                            |
| RpS20-R            | TGGTGATGCGAAGGGTCTTG  | Colinet et al., FEBS J. 2010 Jan;277(1):174-85                                            |
| alpha Tubulin-F    | CACACCACCTGGAGCATTC   | <a href="https://www.flyrnai.org/flyprimerbank">https://www.flyrnai.org/flyprimerbank</a> |
| alpha Tubulin-R    | CCAATCAGACGGTTCAGGTTG | <a href="https://www.flyrnai.org/flyprimerbank">https://www.flyrnai.org/flyprimerbank</a> |
