# Supplementary material for: Drosophila Ref1/ALYREF regulates transcription and toxicity associated with ALS/FTD disease etiologies
Source: Springer Nature journal article supplement (doi:10.1186/s40478-019-0710-x), 2019-04-29
Supplement: MOESM3 [file 25666740]

Table S2

| <b>ID</b> | <b>clinical diagnosis</b> | <b>C9ORF72</b> | <b>Sex</b> | <b>Age-at-Death</b> |
|-----------|---------------------------|----------------|------------|---------------------|
| 1         | Normal                    |                | Male       | 42                  |
| 2         | Normal                    |                | Male       | 55                  |
| 3         | Normal                    |                | Male       | 57                  |
| 4         | Normal                    |                | Male       | 59                  |
| 5         | Normal                    |                | Male       | 62                  |
| 6         | Normal                    |                | Male       | 67                  |
| 7         | Normal                    |                | Male       | 67                  |
| 8         | Normal                    |                | Male       | 68                  |
| 9         | Normal                    |                | Male       | 70                  |
| 10        | ALS                       |                | Male       | 57                  |
| 11        | ALS                       |                | Male       | 58                  |
| 12        | ALS                       | Expansion      | Male       | 58                  |
| 13        | ALS                       | Expansion      | Male       | 60                  |
| 14        | ALS                       |                | Male       | 67                  |
| 15        | ALS                       | Expansion      | Male       | 70                  |
